# Supplementary material for: Glycosylation of Ganoderic Acid G by Bacillus Glycosyltransferases
Source: MDPI journal article supplement (doi:10.3390/ijms22189744), 2021-09-09
Supplement: s1 [file s1]

# Glycosylation of Ganoderic Acid G by *Bacillus* Glycosyltransferases

Jiumn-Yih Wu, <sup>1,\*</sup> Hsiou-Yu Ding, <sup>2,\*</sup> Tzi-Yuan Wang, <sup>3,\*</sup> Yun-Rong Zhang, <sup>4</sup> and Te-Sheng Chang <sup>4,\*</sup>

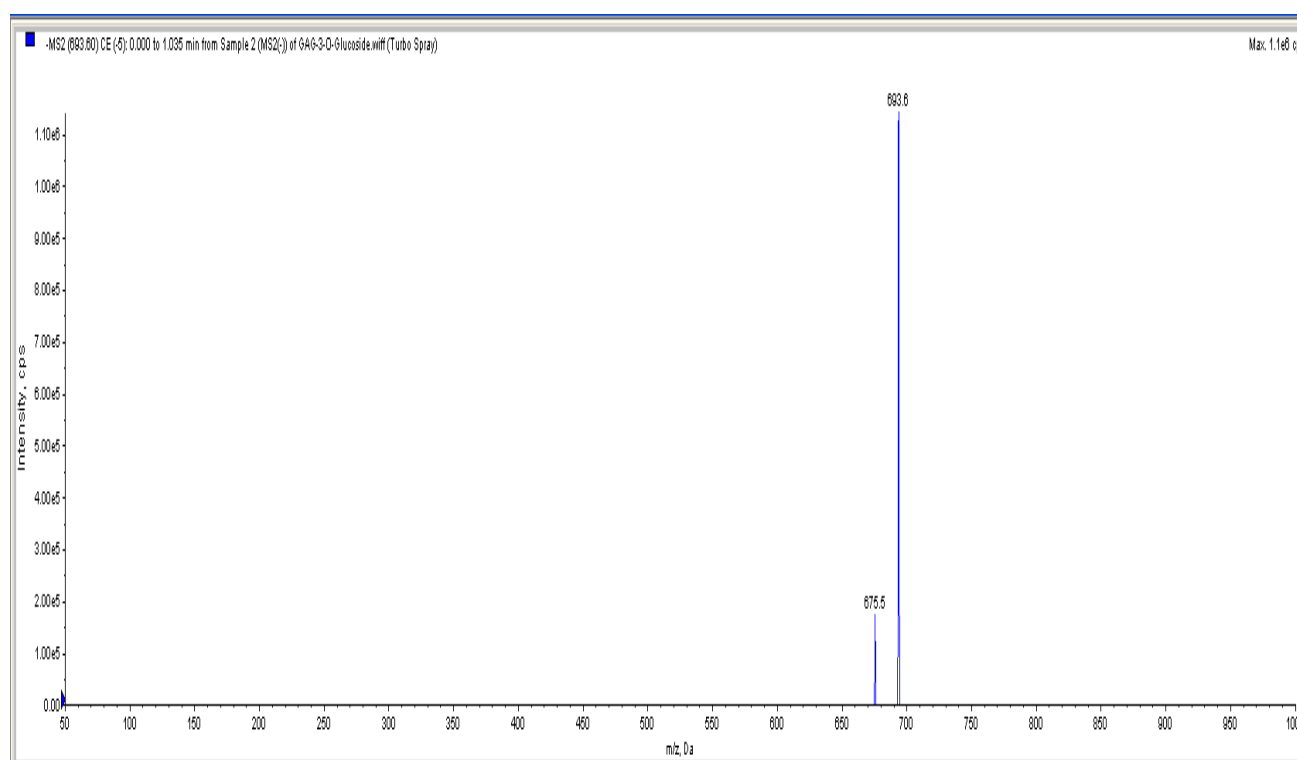

**Figure S1.** Mass-mass analysis of GAG-3-O- $\beta$ -glucoside (**1**) at the negative mode. A significant signal at m/z 693.5 showed the corresponding m/z signal of molecular weight 676 of GAG-glucoside ( $514+180-18$ ) at the negative mode [GAG-G – H].

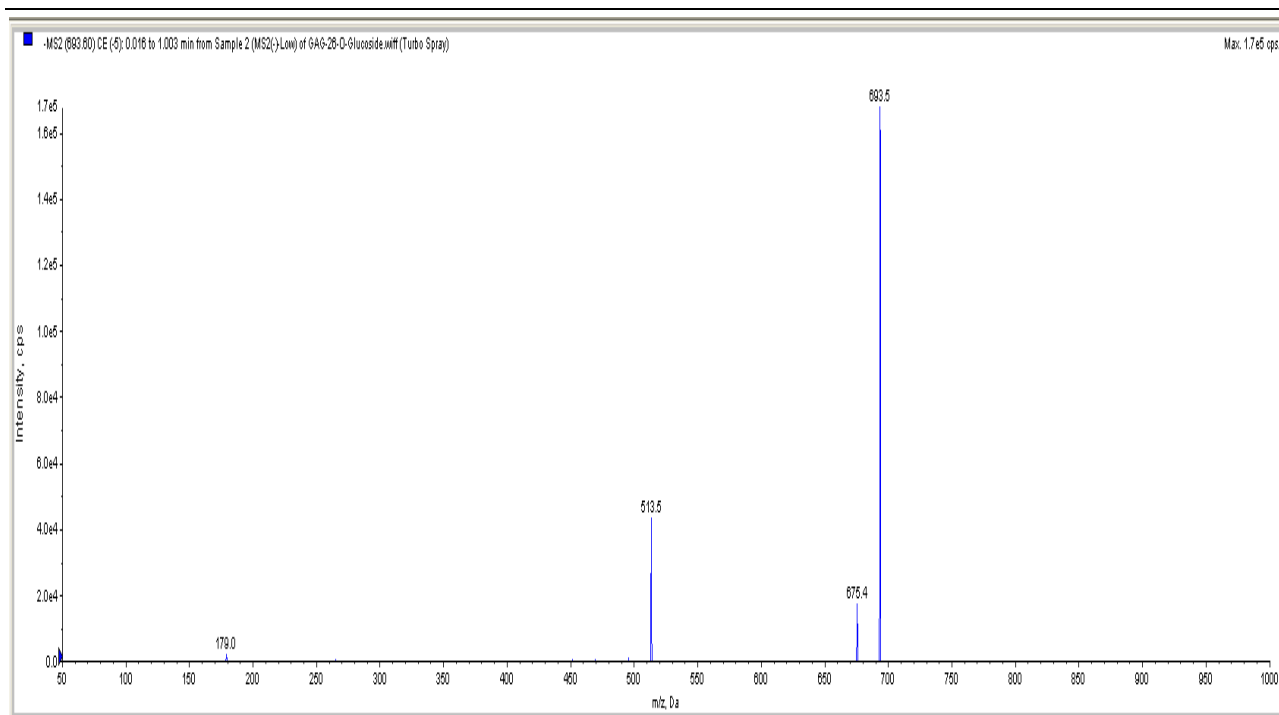

**Figure S2.** Mass-mass analysis of the m/z 693.5 peak of GAG-26-O- $\beta$ -glucoside (**2**) at the negative mode. Two significant peaks at m/z 675,4 and 513.5 showed the corresponding m/z signals of molecular weights 676 and 514 of GAG glucoside (514+180-18) and GAA (514) at the negative mode [GAG-G – H]<sup>−</sup> and [GAG – H]<sup>−</sup>.

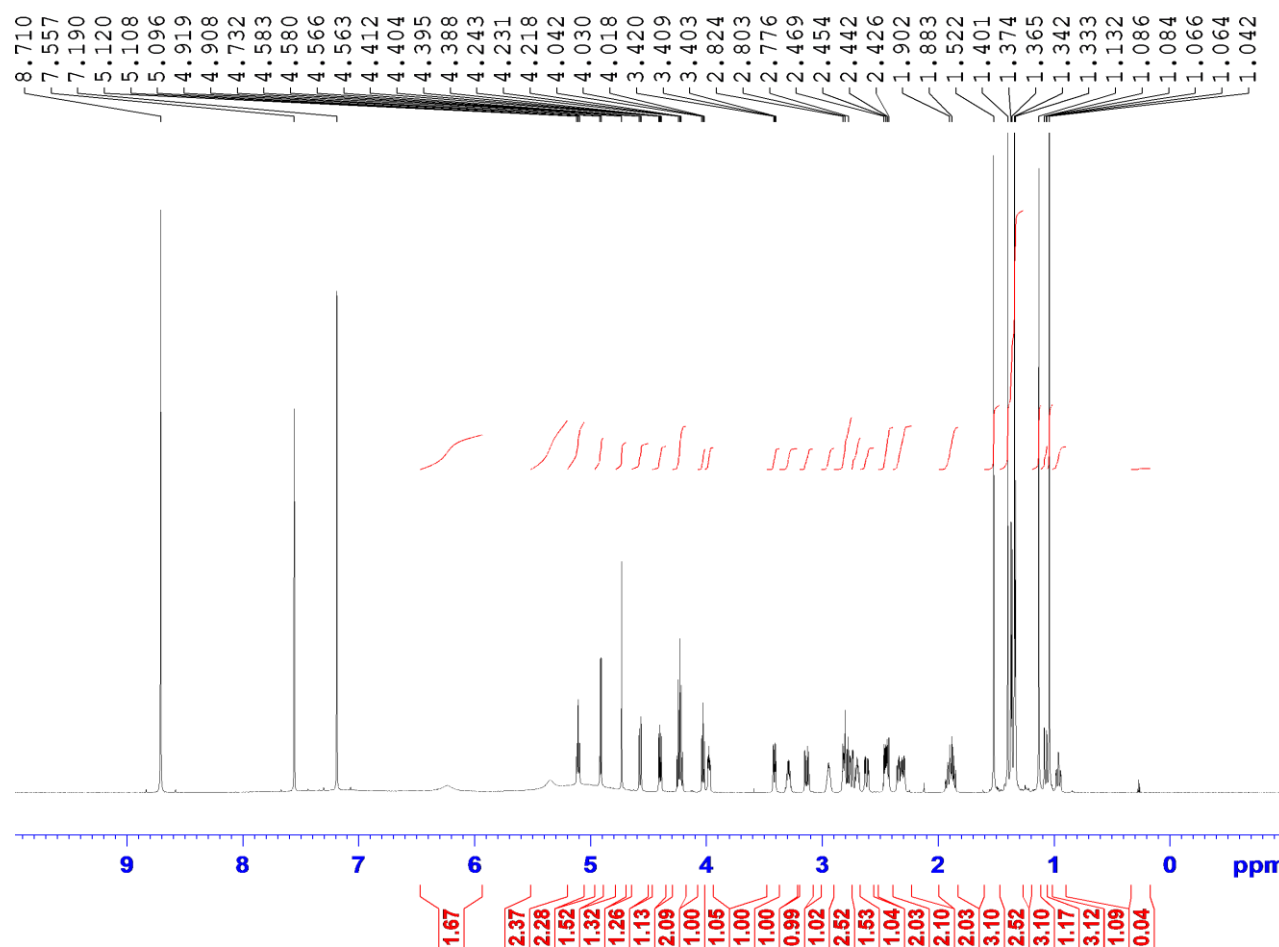

**Figure S3.** The <sup>1</sup>H-NMR (700 MHz) spectrum of GAG-3-O- $\beta$ -glucoside (**1**) in pyridine-d<sub>5</sub>.

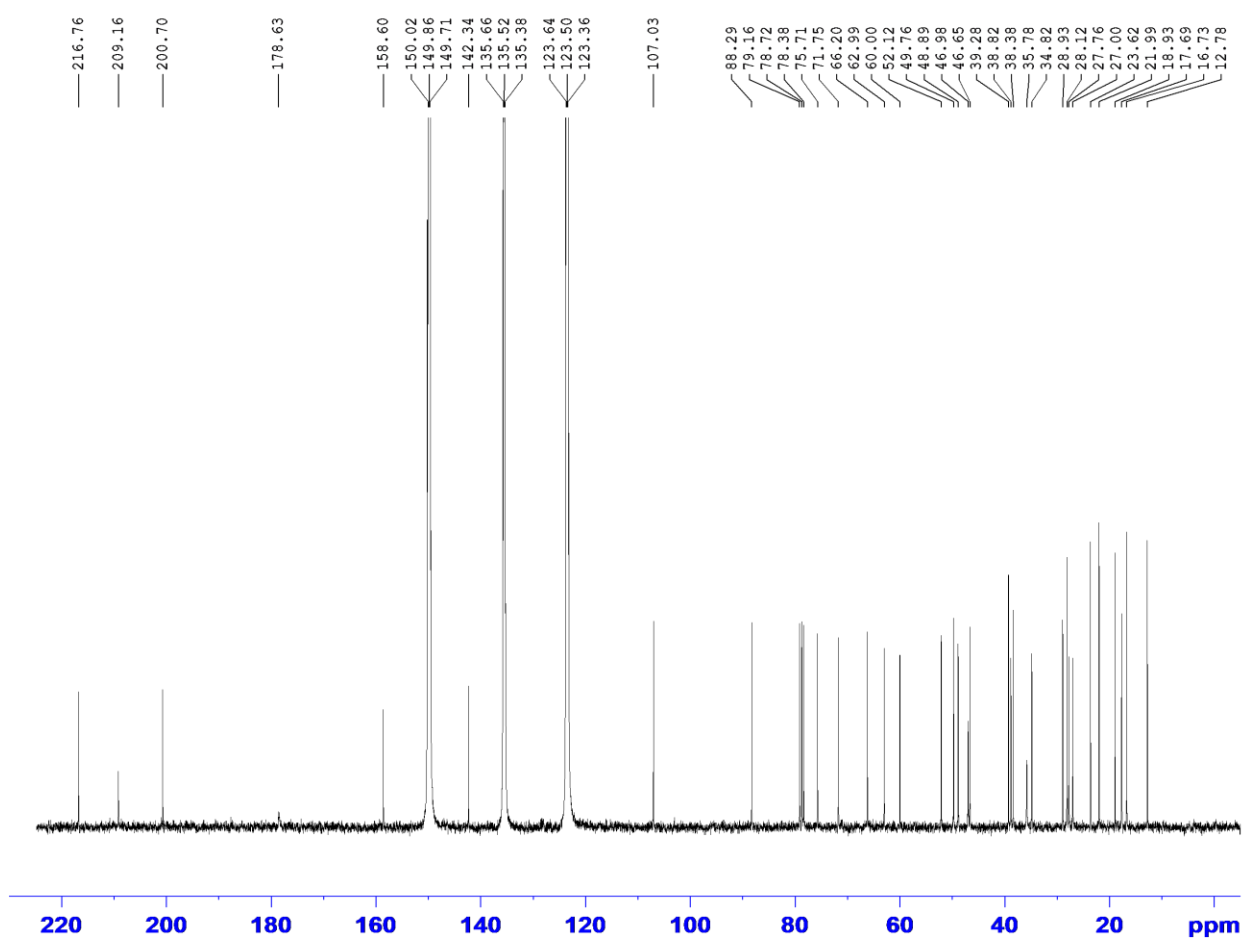

Figure S4. The  $^{13}\text{C}$ -NMR (176 MHz) spectrum of GAG-3-O- $\beta$ -glucoside (1) in pyridine- $\text{d}_5$ .

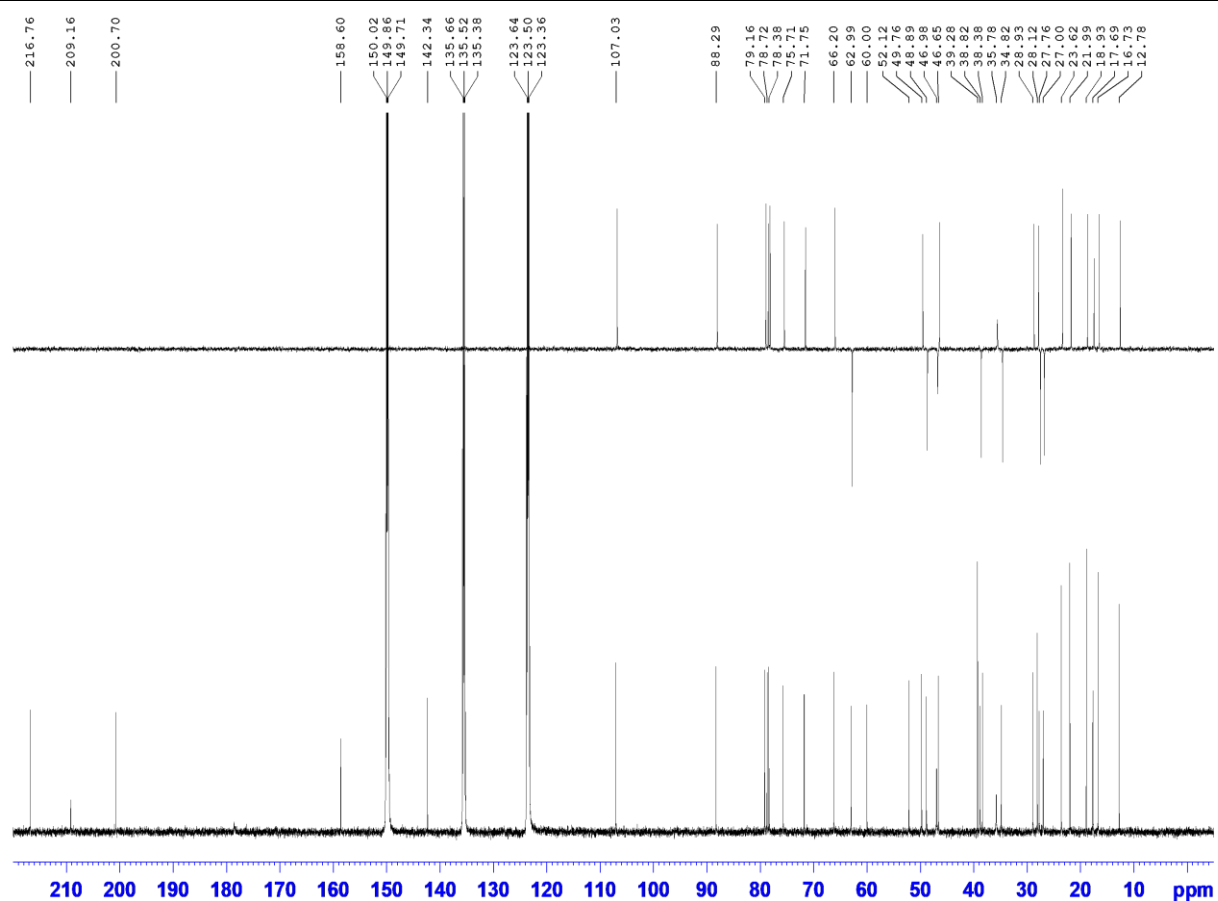

Figure S5. The DEPT-135 (176 MHz) spectrum of GAG-3-O- $\beta$ -glucoside (1) in pyridine-d<sub>5</sub>

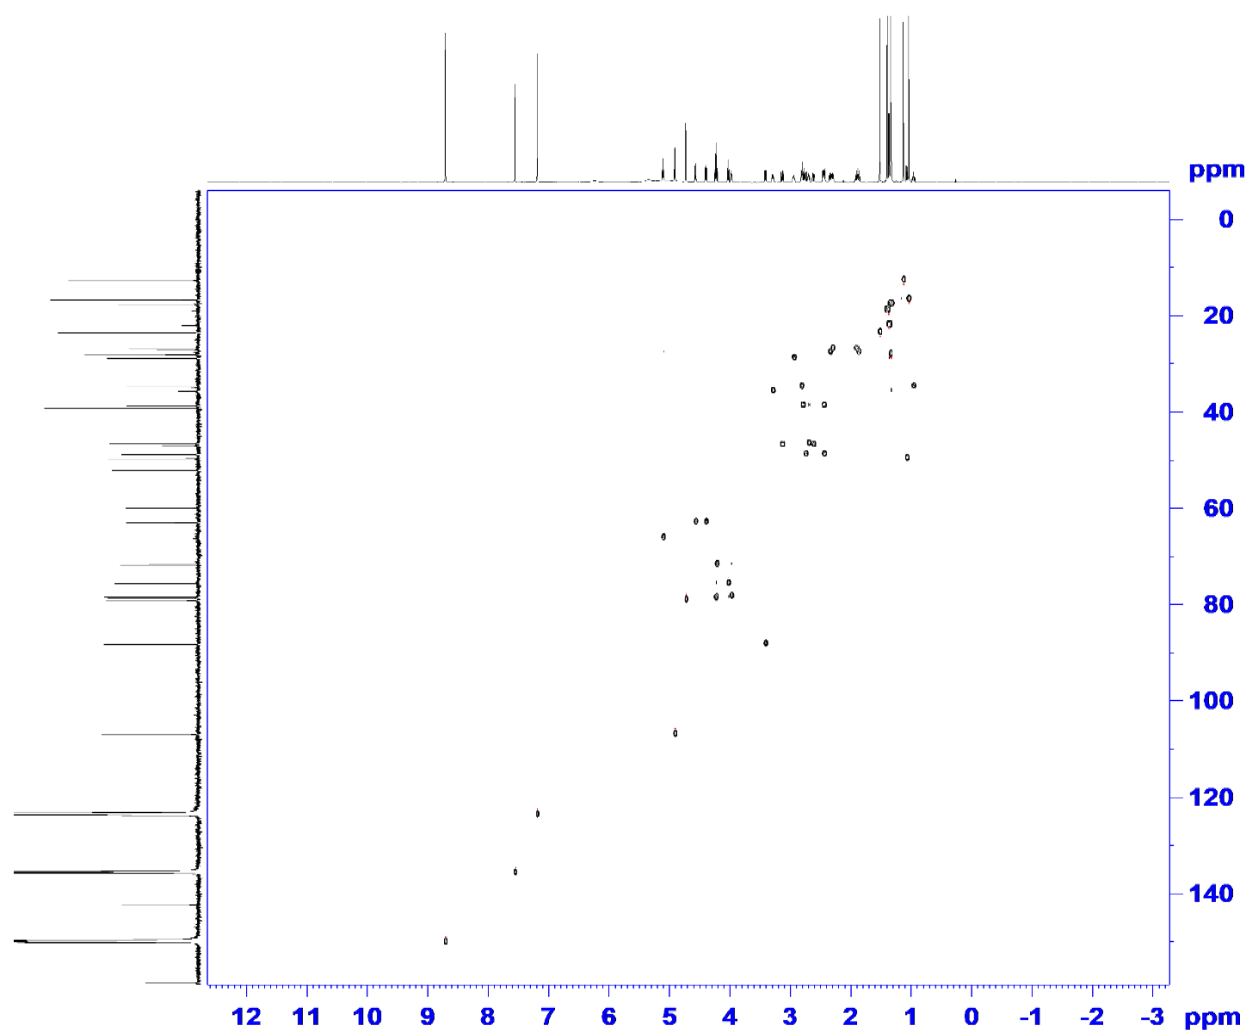

**Figure S6.** The HSQC (700 MHz) spectrum of GAG-3-O- $\beta$ -glucoside (**1**) in pyridine-d<sub>5</sub>.

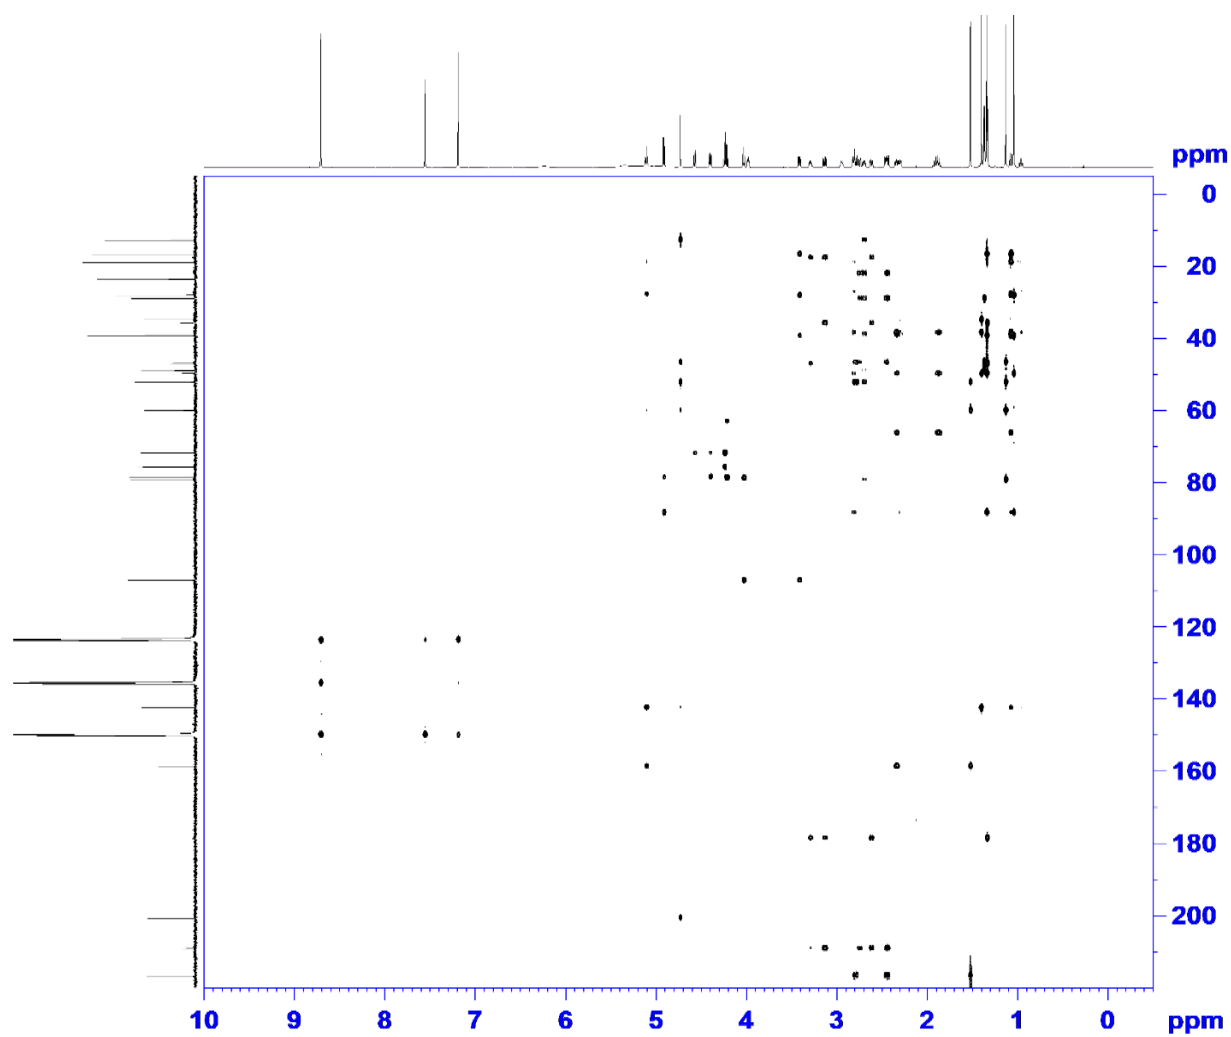

**Figure S7.** The HMBC (700 MHz) spectrum of GAG-3-O- $\beta$ -glucoside (1) in pyridine-d<sub>5</sub>.

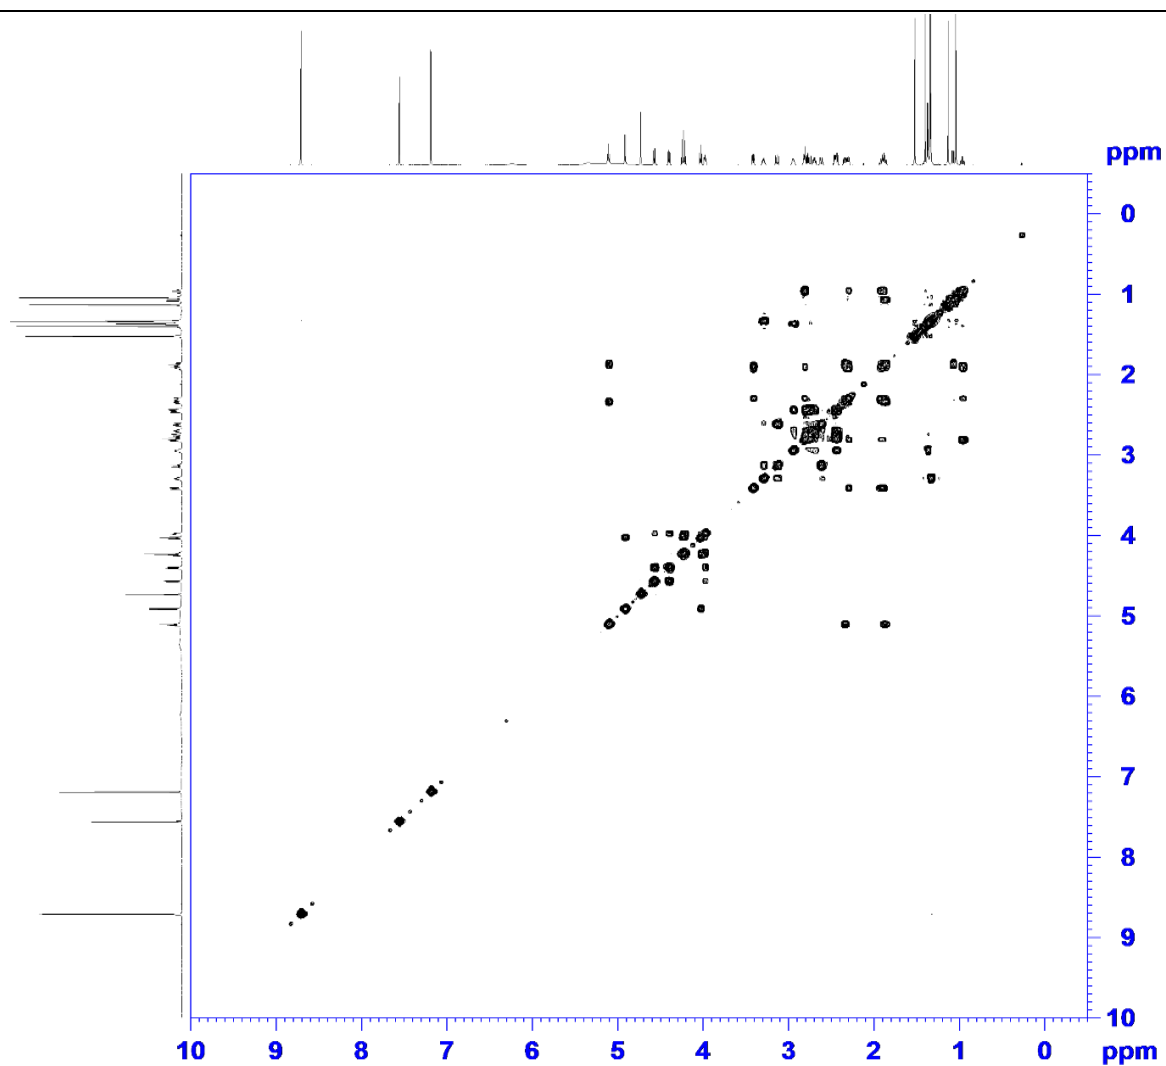

Figure S8. The COSY (700 MHz) spectrum of GAG-3-O- $\beta$ -glucoside (1) in pyridine-d<sub>5</sub>.

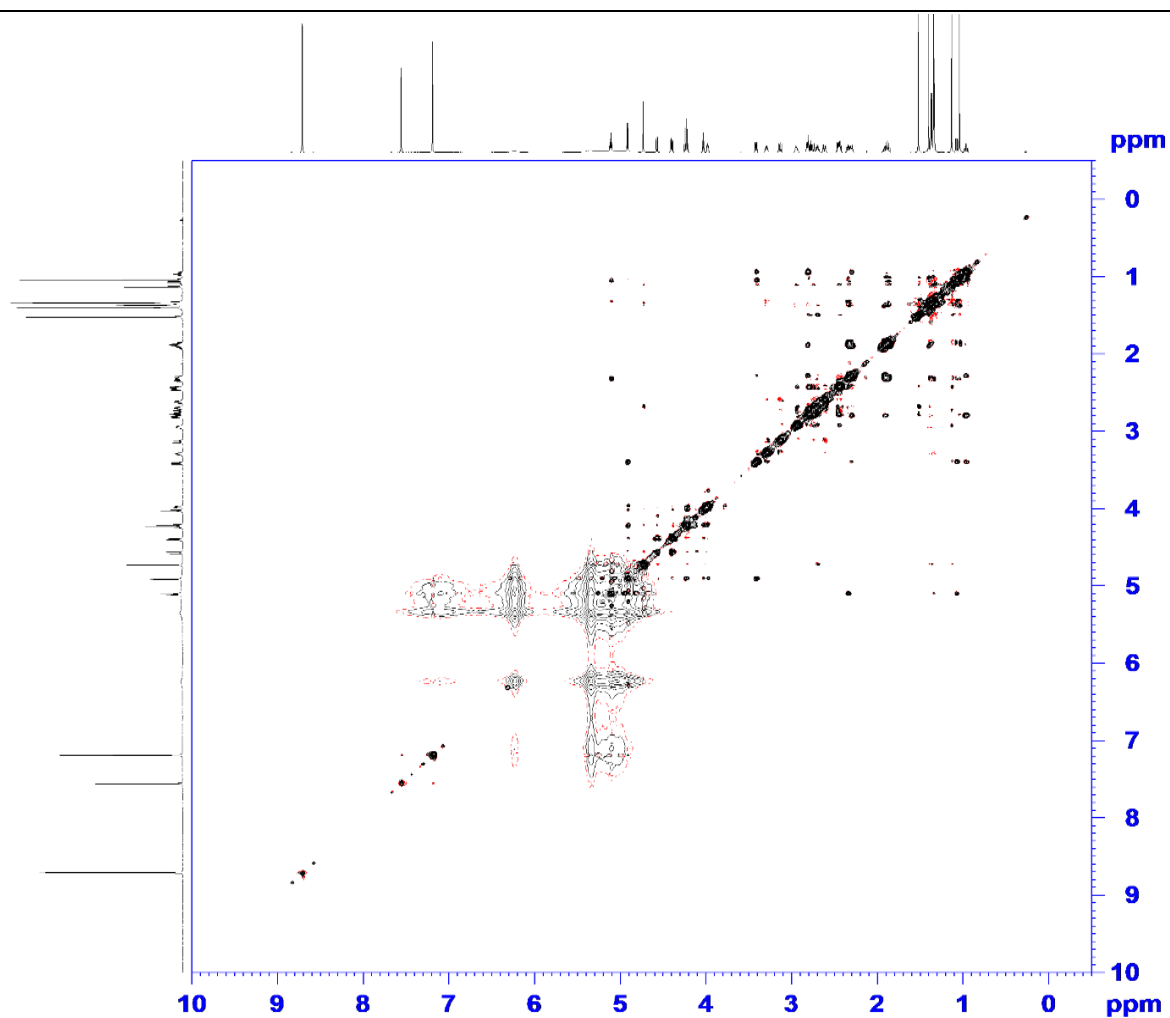

**Figure S9.** The NOESY (700 MHz) spectrum of GAG-3-O- $\beta$ -glucoside (1) in pyridine-d5.



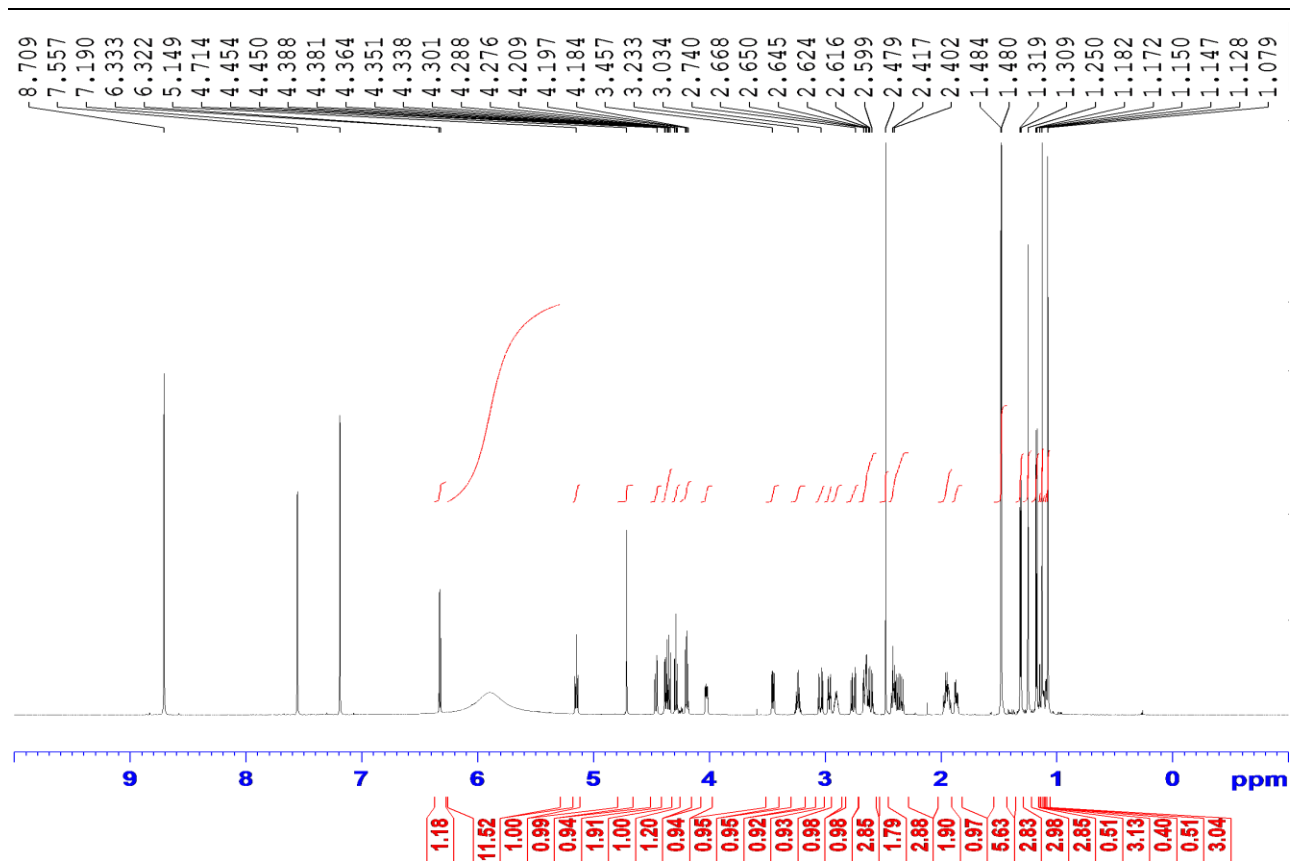

Figure S10. The <sup>1</sup>H-NMR (700 MHz) spectrum of GAG-26-O-β-glucoside (2) in pyridine-d<sub>5</sub>.

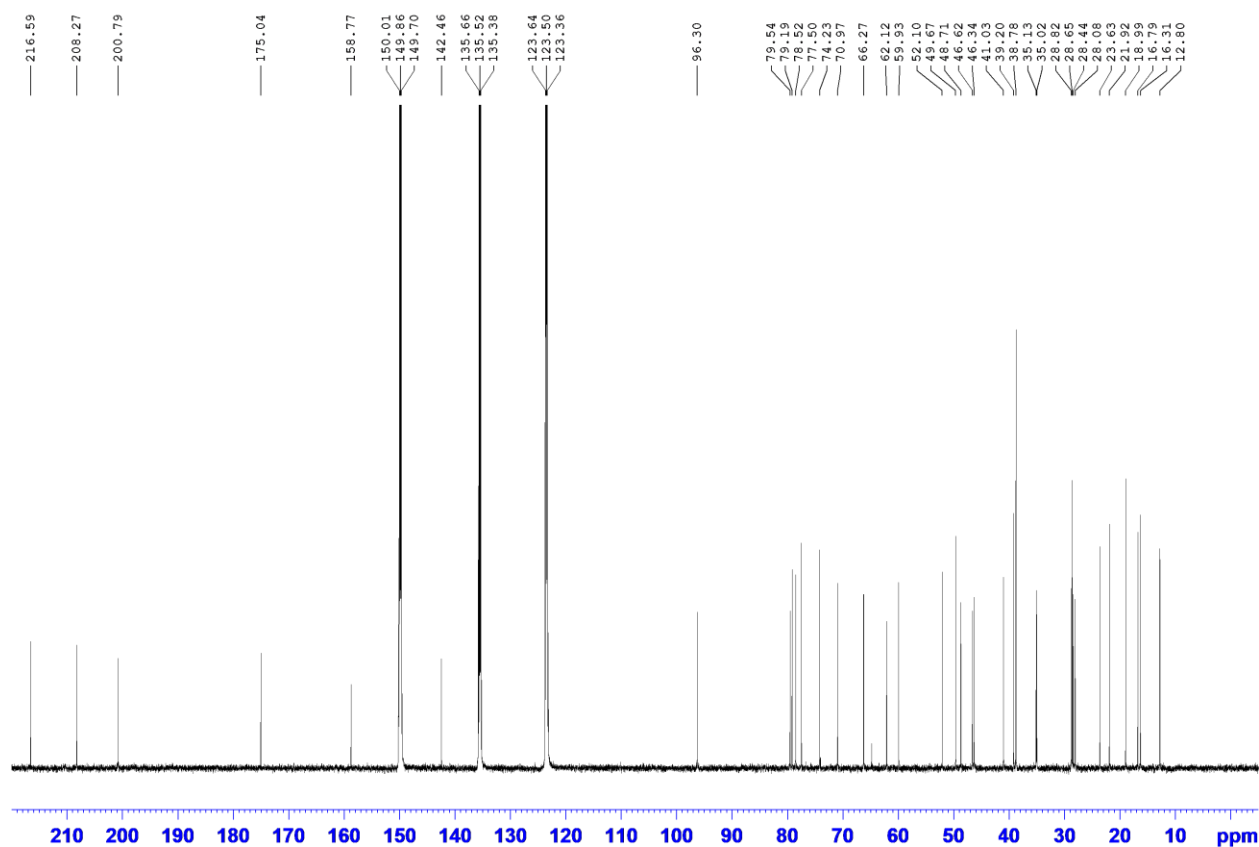

Figure S11. The  $^{13}\text{C}$ -NMR (176 MHz) spectrum of GAG-26-O- $\beta$ -glucoside (2) in pyridine- $\text{d}_5$ .

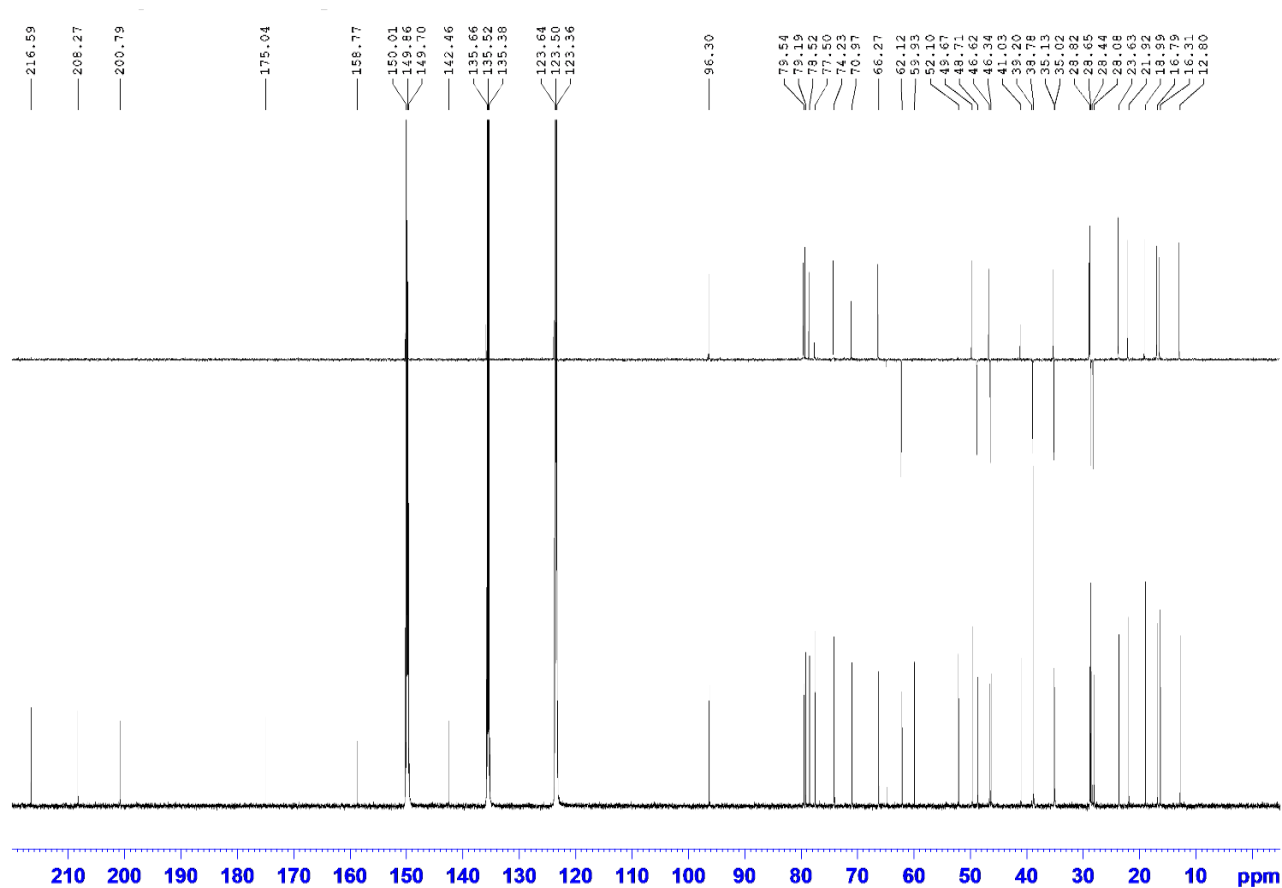

Figure S12. The DEPT-135 (176 MHz) spectrum of GAG-26-O- $\beta$ -glucoside (2) in pyridine-d<sub>5</sub>.

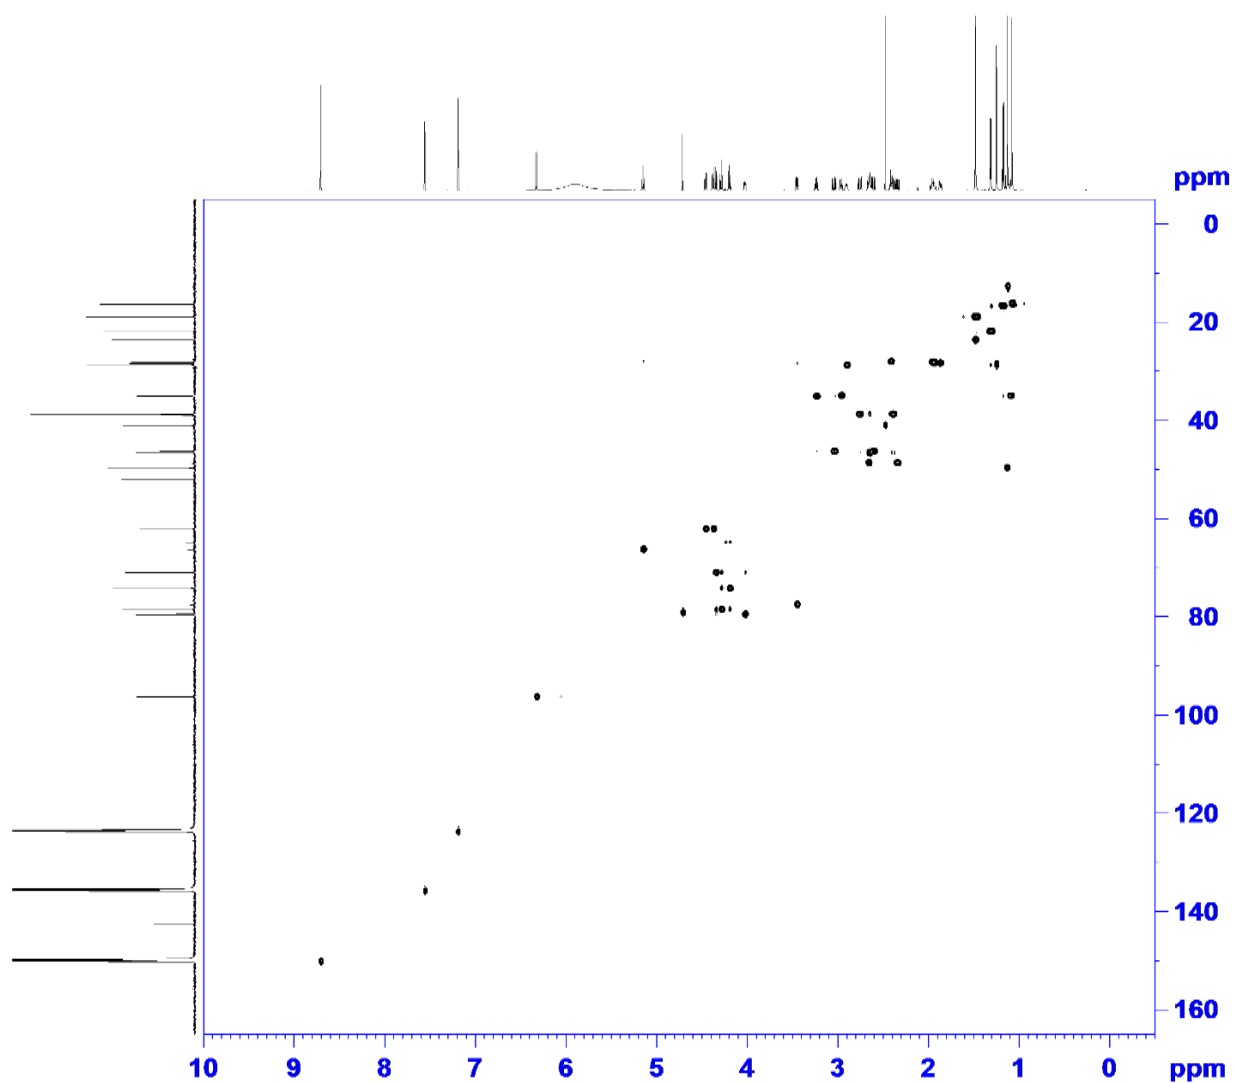

Figure S13. The HSQC (700 MHz) spectrum of GAG-26-O- $\beta$ -glucoside (2) in pyridine- $\text{d}_5$ .

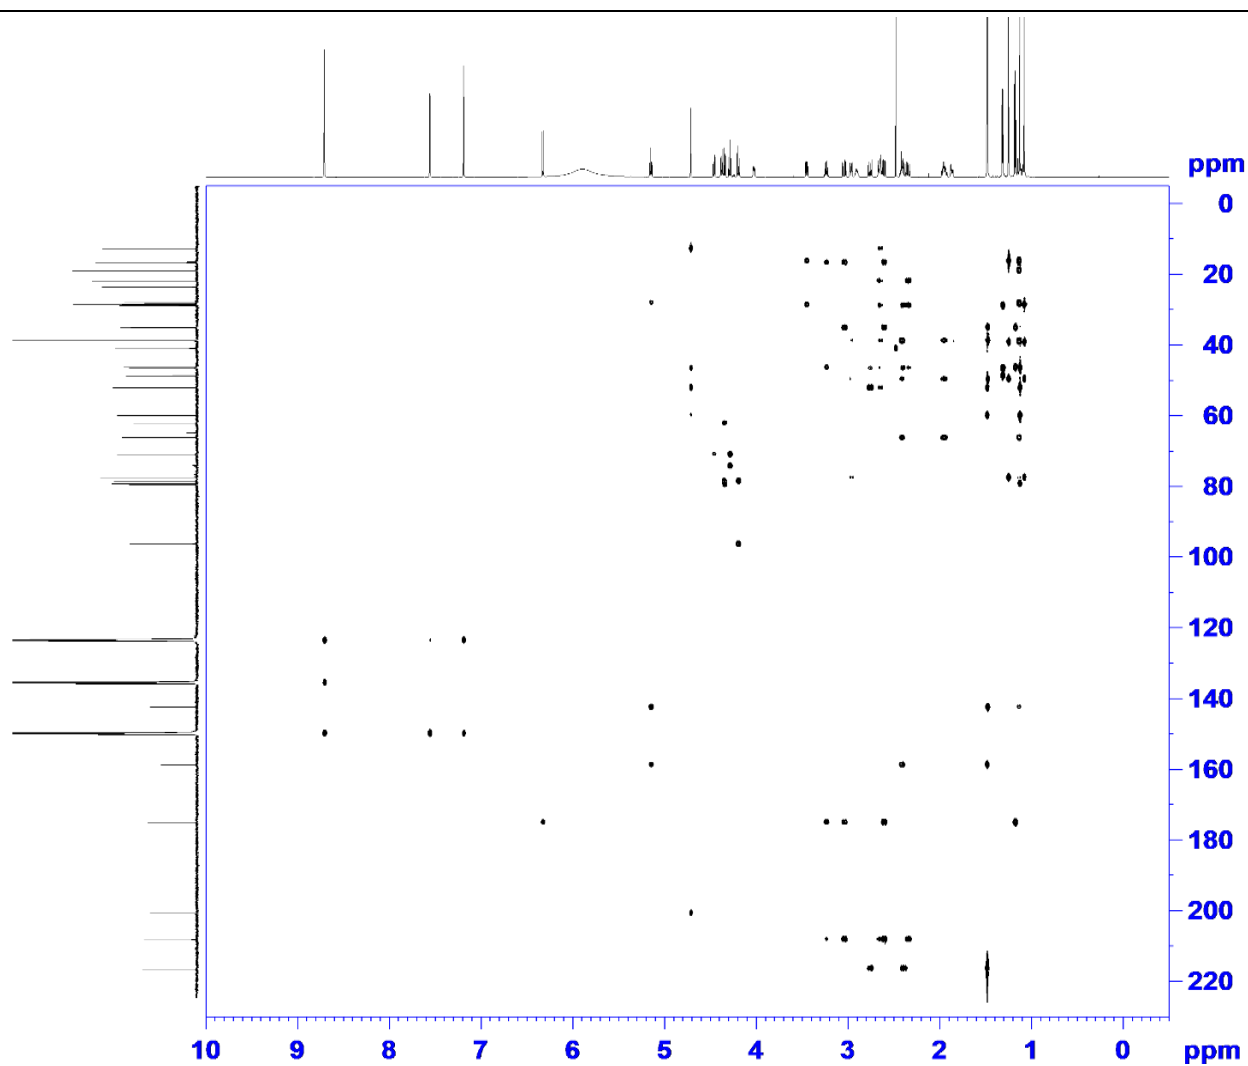

Figure S14. The HMBC (700 MHz) spectrum of GAG-26-O- $\beta$ -glucoside (2) in pyridine-d<sub>5</sub>

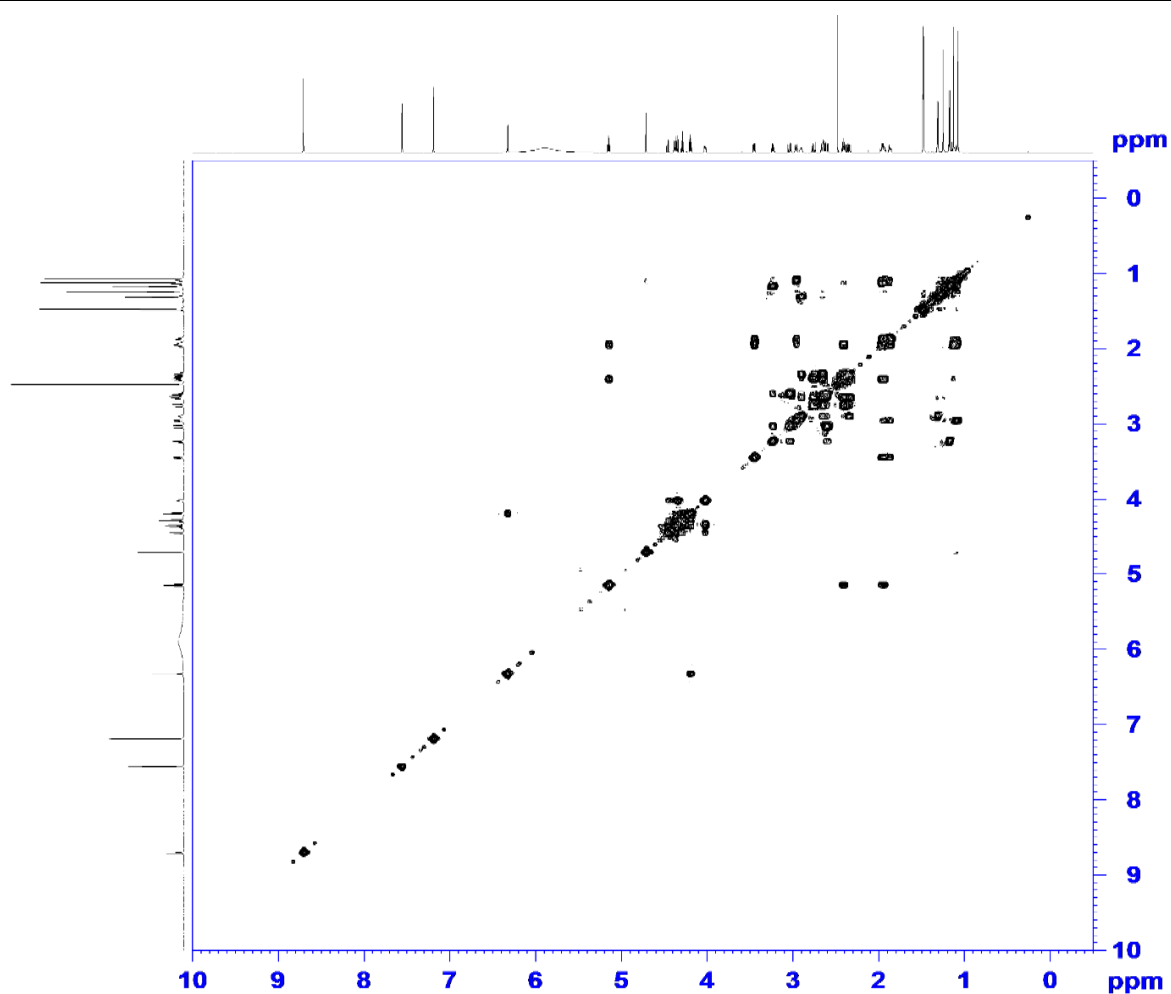

**Figure S15.** The COSY (700 MHz) spectrum of GAG-26-O- $\beta$ -glucoside (2) in pyridine-d<sub>5</sub>.

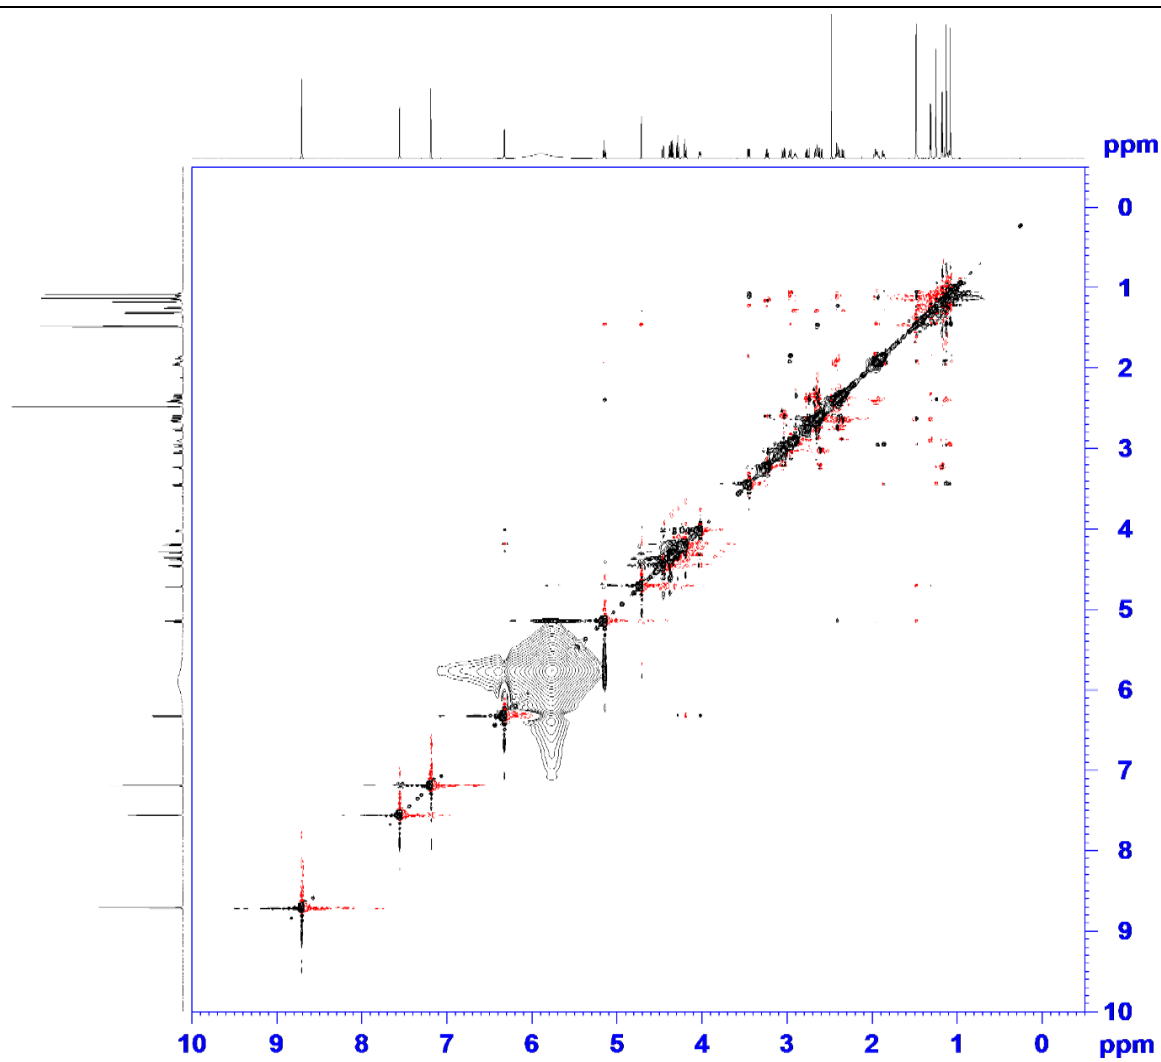

**Figure S16.** The NOESY (700 MHz) spectrum of GAG-26-O- $\beta$ -glucoside (2) in pyridine- $d_5$
